# Supplementary material for: Electrochemiluminescence analysis of folate receptors on cell membrane with on-chip bipolar electrode
Source: Royal Society of Chemistry journal article supplement (doi:10.1039/c1lc20143c), 2011-01-01
Supplement: c1lc20143c.pdf [file c1lc20143c.pdf]

# Electrochemiluminescence analysis of folate receptors on cell membrane with on-chip bipolar electrode

Mei-Sheng Wu, Bi-Yi Xu, Hai-Wei Shi, Jing-Juan Xu\*, Hong-Yuan Chen

5 Key Laboratory of Analytical Chemistry for Life Science, School of Chemistry and Chemical Engineering, Nanjing University, Nanjing 210093, China

\* Author for correspondence (Tel/Fax: +86-25-83587294; E-mail: xujj@nju.edu.cn)

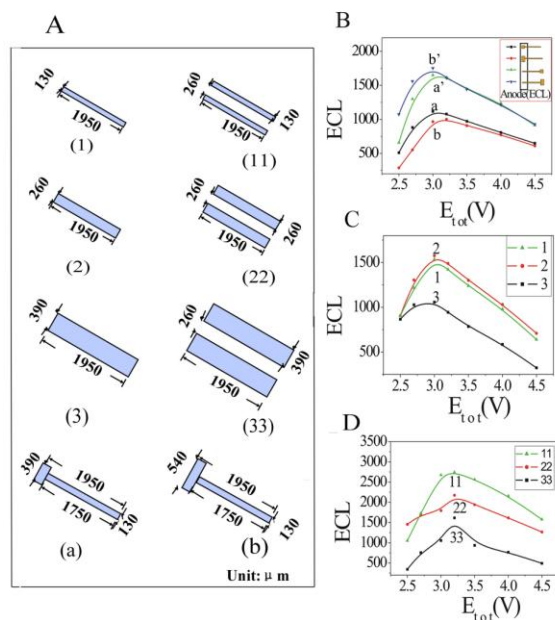

10

**Figure S1.** (A) The configurations of the BPEs used in the experiments. (B-D) ECL responses on these BPEs in 0.1 M PBS (pH 7.4) containing 3.8  $\mu\text{M}$   $\text{Ru}(\text{bpy})_3^{2+}$  and 5.2 mM TPA. The detection time was set at 120s. Curves a and a' or b and b' in (B) were obtained on electrode a or b but with opposite electric field applied on the microchannel.

15

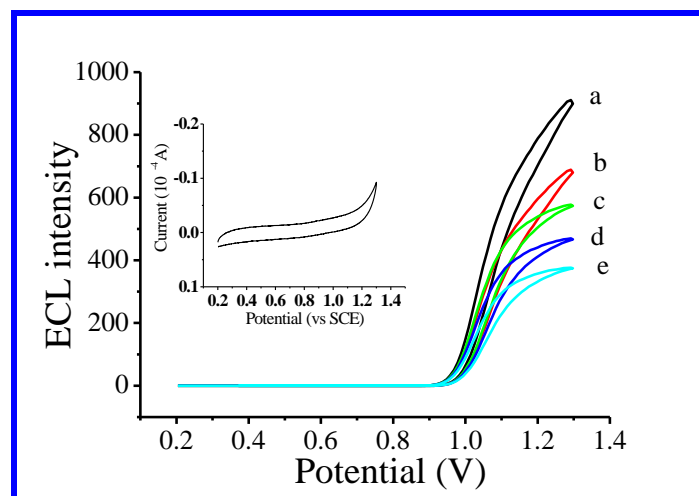

**Figure S2** ECL-potential curves of  $\text{Ru}(\text{bpy})_3^{2+}/\text{TPA}$  system in different concentrations of FA (from a to e: 0, 0.25 pM, 52.5 pM, 7.5 nM, 47.5 nM) at an ITO electrode ( $0.25 \text{ cm}^2$ ). Test solution: 0.1 M PBS containing  $3.8 \text{ }\mu\text{M}$   $\text{Ru}(\text{bpy})_3^{2+}$  and 5.2 mM TPA; scan rate, 0.05V/s. **Inset:** Typical cyclic voltammogram of 0.2 nM FA. The  $0.25 \text{ cm}^2$  ITO electrode was fabricated as follows: ITO-coated aluminosilicate glass slides was first sliced into small pieces with 0.5 cm width and 3 cm length, and then the ITO layer was covered with adhesive tape leaving  $0.25 \text{ cm}^2$  exposed as an ITO electrode.

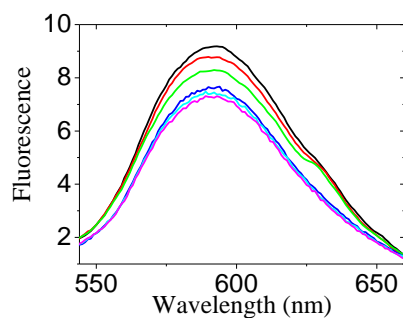

**Figure S2.** Fluorescence spectra of  $\text{Ru}(\text{bpy})_3^{2+}/\text{TPA}$  in different concentrations of FA (from upper to down: 0, 15 pM, 54 pM, 100 pM, 10 nM, 10  $\mu\text{M}$ ). The concentration of  $\text{Ru}(\text{bpy})_3^{2+}$  was  $3.8 \text{ }\mu\text{M}$  and TPA was 5.2 mM.
